# Supplementary material for: Photodynamic treatment with hexyl-aminolevulinate mediates reversible thiol oxidation in core oxidative stress signaling proteins
Source: Royal Society of Chemistry journal article supplement (doi:10.1039/c5mb00744e), 2015-12-24
Supplement: c5mb00744e1.pdf [file c5mb00744e1.pdf]

## Supplementary

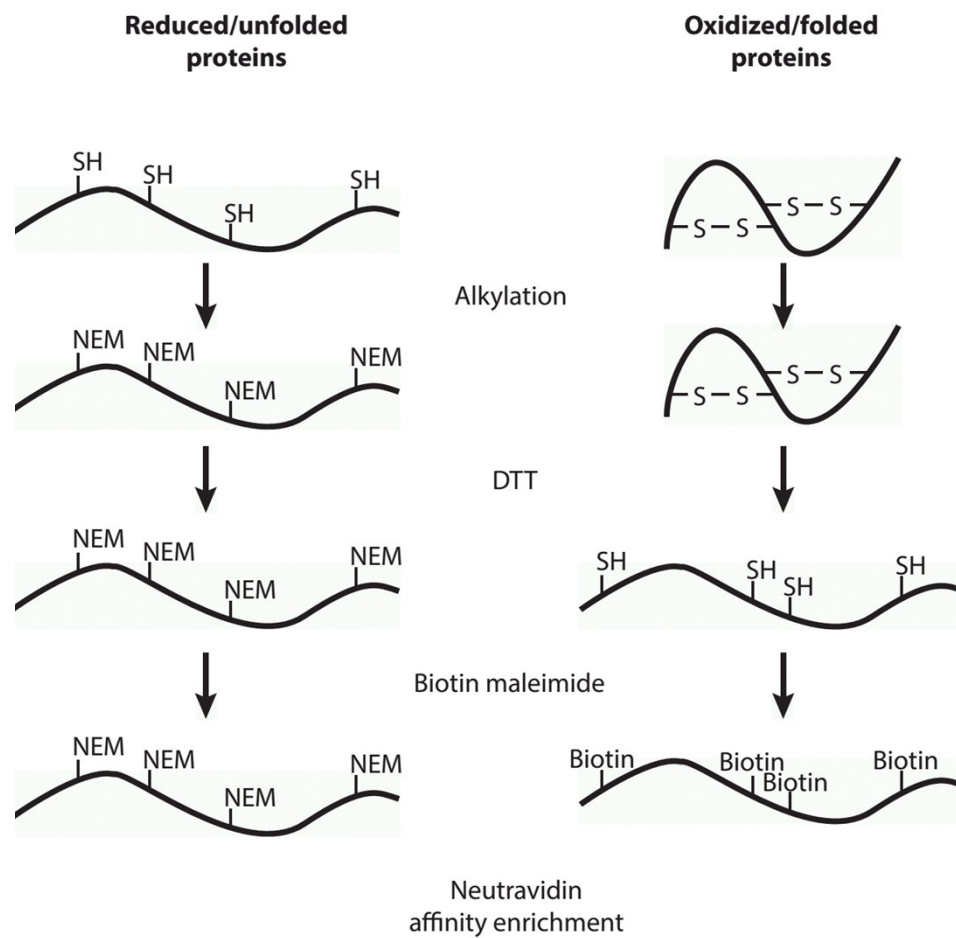

**Figure S 1. Experimental workflow to enrich proteins reversibly oxidized subsequent to HAL-PDT treatment.**

**Table S1. This table is the HAL-PDT dataset and presents high confidence proteins reversibly oxidized by HAL-PDT in A431 cells**

The columns denoted ‘CDP’, ‘dbGSH’ and ‘RedoxDB’ are marked if the proteins are also found in the databases Cell Death Proteomics (Arntzen *et al*, 2013; Arntzen & Thiede, 2012), dbGSH (Chen *et al*, 2014) and RedoxDB (Sun *et al*, 2012), respectively. The column denoted A431 gives proteins identified in A431 cells (Lundberg *et al*, 2010). The columns denoted Pc4 and Gd give proteins identified to be reversibly oxidized after Pc4-PDT (Tsaytler *et al*, 2008) and oxidized after gadolinium-PDT (Qi *et al*, 2015).

| Gene Symbol | Uniprot ID | Protein Name                                                           | Gene ontology (cellular component)             | dbGSH | Redox DB | Cell Death | A431 | Pc4 | Gd |
|-------------|------------|------------------------------------------------------------------------|------------------------------------------------|-------|----------|------------|------|-----|----|
| AACS        | Q86V21     | Acetoacetyl-CoA synthetase                                             | cytosol                                        |       |          |            | +    |     |    |
| ABCC1       | P33527-8   | Isoform 8 of Multidrug resistance-associated protein 1                 | basolateral plasma membrane                    |       |          | +          | +    |     |    |
| ABCD3       | F5GYC1     | ATP-binding cassette sub-family D member 3                             |                                                |       |          |            | +    |     | +  |
| ABCF2       | Q9UG63     | Isoform 2 of ATP-binding cassette sub-family F member 2                | ATP-binding cassette (ABC) transporter complex |       |          |            | +    |     |    |
| ACACB       | O00763-2   | Isoform 2 of Acetyl-CoA carboxylase 2                                  | cytosol                                        |       |          |            | +    |     |    |
| ACADM       | B7Z9I1     | Medium-chain-specific acyl-CoA dehydrogenase, mitochondrial (Fragment) | mitochondrion                                  |       |          |            | +    | +   |    |
| ACAT1       | P24752     | Acetyl-CoA acetyltransferase, mitochondrial (Fragment)                 | extracellular exosome                          | +     |          |            | +    |     |    |
| ACOT9       | Q9Y305-2   | Isoform 2 of Acyl-coenzyme A thioesterase 9, mitochondrial             | mitochondrion                                  |       |          |            | +    |     |    |
| ACSL3       | O95573     | Long-chain-fatty-acid--CoA ligase 3                                    | endoplasmic reticulum                          |       |          |            | +    |     |    |
| ACSL4       | O60488-2   | Isoform Short of Long-chain-fatty-acid--CoA ligase 4                   | cytoplasm                                      | +     |          |            | +    |     | +  |
| ACTA1       | A6NL76     | Actin, alpha skeletal muscle                                           |                                                | +     |          |            | +    |     | +  |
| ACTA2       | F6UVQ4     | Actin, aortic smooth muscle (Fragment)                                 |                                                | +     | +        |            | +    |     |    |
| ACTC1       | P68032     | Actin, alpha cardiac muscle 1                                          | actin filament                                 | +     | +        |            | +    |     | +  |

|         |          |                                                                                     |                                               |   |   |   |   |   |   |
|---------|----------|-------------------------------------------------------------------------------------|-----------------------------------------------|---|---|---|---|---|---|
| ACTG2   | C9JFL5   | Actin, gamma-enteric smooth muscle (Fragment)                                       |                                               | + |   |   | + |   |   |
| ACTN2   | P35609   | Alpha-actinin-2                                                                     | actin filament                                |   |   | + |   |   |   |
| ACTR1B  | P42025   | Beta-centractin                                                                     | centrosome                                    |   |   |   | + |   |   |
| ADPRHL2 | Q9NX46   | Poly(ADP-ribose) glycohydrolase ARH3                                                | mitochondrial matrix                          |   |   |   | + |   |   |
| ADSL    | P30566   | Adenylosuccinate lyase (Fragment)                                                   | cytosol                                       | + | + |   |   |   |   |
| AFAP1L2 | F6QUH3   | Actin filament-associated protein 1-like 2 (Fragment)                               | cytoplasm                                     |   |   |   | + |   |   |
| AIM1    | Q9Y4K1   | Absent in melanoma 1 protein                                                        |                                               |   |   |   | + |   |   |
| AIMP1   | Q12904   | Aminoacyl tRNA synthase complex-interacting multifunctional protein 1               | aminoacyl-tRNA synthetase multienzyme complex | + |   |   | + |   | + |
| ALYREF  | E9PB61   | THO complex subunit 4                                                               | intracellular membrane-bounded organelle      |   |   | + | + |   | + |
| ANXA1   | Q5T3N0   | Annexin (Fragment)                                                                  | cytoplasm                                     |   | + | + | + |   | + |
| ANXA4   | Q6P452   | Annexin                                                                             |                                               |   |   | + | + |   | + |
| AP3B2   | Q13367-3 | Isoform 3 of AP-3 complex subunit beta-2                                            | AP-3 adaptor complex                          |   |   |   |   |   |   |
| AP3D1   | O14617-3 | Isoform 3 of AP-3 complex subunit delta-1                                           | endosome membrane                             | + |   | + | + |   |   |
| APEX1   | G3V5M0   | DNA-(apurinic or apyrimidinic site) lyase (Fragment)                                | intracellular                                 | + | + | + | + | + |   |
| ARHGAP1 | Q07960   | Rho GTPase-activating protein 1                                                     | cytoplasm                                     |   |   | + | + |   | + |
| ARHGEF2 | Q5VY93   | Rho guanine nucleotide exchange factor 2                                            |                                               | + |   | + | + |   |   |
| ARPC2   | O15144   | Actin-related protein 2/3 complex subunit 2 (Fragment)                              | actin cytoskeleton                            |   |   | + | + |   | + |
| ASAP2   | O43150-2 | Isoform 2 of Arf-GAP with SH3 domain, ANK repeat and PH domain-containing protein 2 | Golgi cisterna membrane                       |   |   |   |   |   |   |
| ASNS    | F8WEJ5   | Asparagine synthetase [glutamine-hydrolyzing]                                       |                                               | + |   | + | + |   |   |

|         |          |                                                                    |                                            |   |   |   |   |   |   |
|---------|----------|--------------------------------------------------------------------|--------------------------------------------|---|---|---|---|---|---|
| ATAD3C  | Q5T2N8   | ATPase family AAA domain-containing protein 3C                     |                                            |   |   |   |   |   |   |
| ATM     | Q13315   | Serine-protein kinase ATM                                          | cytoplasmic membrane-bounded vesicle       |   |   |   |   |   |   |
| ATP1B1  | V9GYR2   | Sodium/potassium-transporting ATPase subunit beta (Fragment)       | sodium:potassium-exchanging ATPase complex |   |   |   | + |   |   |
| ATP6V1A | P38606   | V-type proton ATPase catalytic subunit A                           | apical plasma membrane                     |   |   |   | + |   | + |
| AZGP1   | P25311   | Zinc-alpha-2-glycoprotein                                          | extracellular exosome                      |   |   |   | + |   |   |
| BCAP31  | C9JSP1   | B-cell receptor-associated protein 31 (Fragment)                   | endoplasmic reticulum                      |   |   | + | + |   | + |
| BCLAF1  | H0YF00   | Bcl-2-associated transcription factor 1 (Fragment)                 | nucleus                                    |   |   | + | + |   | + |
| CAND2   | F8WBB8   | Cullin-associated NEDD8-dissociated protein 2                      | nucleus                                    |   |   |   |   |   |   |
| CANX    | P27824   | Calnexin                                                           | axon                                       |   |   | + | + | + | + |
| CAPZB   | B1AK87   | Capping protein (Actin filament) muscle Z-line, beta, isoform CRA  | actin filament                             |   | + | + | + |   | + |
| CARM1   | Q86X55-2 | Isoform 2 of Histone-arginine methyltransferase CARM1              | cytoplasm                                  |   |   |   | + |   |   |
| CARS    | P49589-2 | Isoform 2 of Cysteine--tRNA ligase, cytoplasmic                    | cytoplasm                                  |   |   |   | + | + |   |
| CBR1    | P16152   | Carbonyl reductase [NADPH] 1                                       | cytosol                                    | + | + |   | + | + | + |
| CBR3    | O75828   | Carbonyl reductase [NADPH] 3                                       | cytoplasm                                  |   |   | + | + |   |   |
| CC2D1A  | Q6P1N0-2 | Isoform 2 of Coiled-coil and C2 domain-containing protein 1A       | cytoplasm                                  |   |   |   | + |   |   |
| CCAR1   | Q8IX12-2 | Isoform 2 of Cell division cycle and apoptosis regulator protein 1 | nucleoplasm                                | + |   |   | + |   |   |
| CDC45   | O75419-2 | Isoform 2 of Cell division control protein 45 homolog              | centrosome                                 |   |   |   | + |   |   |
| CDK1    | P06493   | Cyclin-dependent kinase 1 (Fragment)                               | centrosome                                 |   |   | + | + |   | + |

|          |            |                                                                    |                                                            |   |  |   |   |   |   |
|----------|------------|--------------------------------------------------------------------|------------------------------------------------------------|---|--|---|---|---|---|
| CDC2     | A0A024QZP7 | Cell division cycle 2, G1 to S and G2 to M, isoform CRA            |                                                            |   |  | + | + |   | + |
| CHD4     | F5GWX5     | Chromodomain-helicase-DNA-binding protein 4                        | nucleoplasm                                                | + |  | + | + |   | + |
| CKAP4    | Q07065     | Cytoskeleton-associated protein 4                                  | cytoskeleton                                               |   |  |   | + |   | + |
| COG5     | Q9UP83-3   | Isoform 3 of Conserved oligomeric Golgi complex subunit 5          | cytosol                                                    |   |  |   | + |   |   |
| COLGALT1 | Q8NBJ5     | Procollagen galactosyltransferase 1                                | endoplasmic reticulum lumen                                | + |  |   | + |   | + |
| COPS2    | P61201     | COP9 signalosome complex subunit 2                                 | COP9 signalosome                                           |   |  |   | + |   |   |
| CPSF3    | G5E9W3     | Cleavage and polyadenylation specific factor 3, 73kDa, isoform CRA |                                                            | + |  |   | + |   | + |
| CPSF6    | Q16630     | Cleavage and polyadenylation specificity factor subunit 6          | membrane                                                   | + |  | + | + |   | + |
| CPSF3L   | H0YE15     | Integrator complex subunit 11 (Fragment)                           |                                                            |   |  |   | + |   |   |
| CPT1A    | P50416-2   | Isoform 2 of Carnitine O-palmitoyltransferase 1, liver isoform     | integral component of mitochondrial outer membrane         |   |  | + |   |   |   |
| CSK      | H3BU69     | Tyrosine-protein kinase CSK (Fragment)                             | extrinsic component of cytoplasmic side of plasma membrane | + |  |   | + |   |   |
| CTNNB1   | Q8WYA6-4   | Isoform 4 of Beta-catenin-like protein 1                           | cytoplasm                                                  |   |  |   | + |   |   |
| CTPS1    | P17812     | Isoform 2 of CTP synthase 1                                        | cytosol                                                    | + |  |   | + |   |   |
| CTTN     | Q14247     | Src substrate cortactin                                            | cell cortex                                                |   |  | + | + | + | + |
| CUL3     | Q13618-2   | Isoform 2 of Cullin-3                                              | Cul3-RING ubiquitin ligase complex                         |   |  |   | + |   |   |
| CUL4A    | A0A087WWN2 | Cullin-4A                                                          |                                                            |   |  |   | + |   |   |
| CUL4B    | Q13620-3   | Isoform 3 of Cullin-4B                                             | Cul4B-RING E3 ubiquitin ligase                             |   |  | + | + |   |   |

|         |            |                                                        |                                       |   |  |   |   |   |   |
|---------|------------|--------------------------------------------------------|---------------------------------------|---|--|---|---|---|---|
|         |            |                                                        | complex                               |   |  |   |   |   |   |
| CYB5R3  | P00387-2   | NADH-cytochrome b5 reductase 3                         | cytoplasm                             |   |  |   | + |   | + |
| DAP3    | P51398-2   | 28S ribosomal protein S29, mitochondrial (Fragment)    | mitochondrial inner membrane          |   |  |   | + |   |   |
| DDB1    | F5H581     | DNA damage-binding protein 1 (Fragment)                |                                       | + |  |   | + | + |   |
| DDRGK1  | Q96HY6     | DDRGK domain-containing protein 1                      | endoplasmic reticulum                 |   |  |   | + |   |   |
| DDX5    | P17844     | Probable ATP-dependent RNA helicase DDX5               | catalytic step 2 spliceosome          | + |  | + | + |   | + |
| DDX6    | P26196     | Probable ATP-dependent RNA helicase DDX6               | cytoplasm                             | + |  |   | + |   | + |
| DDX50   | Q9BQ39     | ATP-dependent RNA helicase DDX50                       | membrane                              |   |  |   | + |   |   |
| DDX3X   | A0A0J9YVQ7 | ATP-dependent RNA helicase DDX3X (Fragment)            |                                       | + |  |   | + | + | + |
| DDX3Y   | O15523     | ATP-dependent RNA helicase DDX3Y                       | cytoplasmic ribonucleoprotein granule | + |  | + | + |   |   |
| DECR1   | E5RJD2     | 2,4-dienoyl-CoA reductase, mitochondrial (Fragment)    |                                       |   |  |   | + |   |   |
| DEK     | D6R9L5     | Protein DEK (Fragment)                                 |                                       | + |  |   | + |   | + |
| DHCR7   | Q9UBM7     | 7-dehydrocholesterol reductase                         | endoplasmic reticulum                 |   |  |   | + |   |   |
| DHX8    | F5H658     | ATP-dependent RNA helicase DHX8                        | cytoplasm                             |   |  |   | + |   |   |
| DHX30   | Q7L2E3-3   | Isoform 3 of Putative ATP-dependent RNA helicase DHX30 | cytoplasm                             | + |  |   | + |   |   |
| DNAJB11 | H7C2Y5     | DnaJ homolog subfamily B member 11 (Fragment)          |                                       |   |  |   | + |   |   |
| DNAJC2  | Q99543-2   | Isoform 2 of DnaJ homolog subfamily C member 2         | cytoplasm                             | + |  |   | + |   |   |
| DNAJC3  | Q13217     | DnaJ homolog subfamily C member 3                      | cytoplasm                             |   |  |   | + |   |   |

|          |            |                                                                   |                                       |   |   |   |   |   |   |
|----------|------------|-------------------------------------------------------------------|---------------------------------------|---|---|---|---|---|---|
| DNAJC7   | K7EJE9     | DnaJ homolog subfamily C member 7 (Fragment)                      | cytoplasm                             | + |   | + | + |   |   |
| DRG1     | Q9Y295     | Developmentally-regulated GTP-binding protein 1                   | cytoplasm                             |   |   |   | + |   | + |
| DYNC1I2  | Q13409-6   | Isoform 2E of Cytoplasmic dynein 1 intermediate chain 2           | centrosome                            |   |   |   | + | + |   |
| DYNC1LI2 | J3KRI4     | Cytoplasmic dynein 1 light intermediate chain 2 (Fragment)        | cytoplasmic dynein complex            | + |   |   | + |   |   |
| ECHDC1   | Q9NTX5-3   | Isoform 3 of Ethylmalonyl-CoA decarboxylase                       | cytosol                               |   |   |   | + |   |   |
| ECHS1    | P30084     | Enoyl-CoA hydratase, mitochondrial                                | extracellular exosome                 | + | + |   | + |   | + |
| EIF2B1   | F5H0D0     | Translation initiation factor eIF-2B subunit alpha                |                                       |   |   |   | + |   | + |
| EIF2S2   | P20042     | Eukaryotic translation initiation factor 2 subunit 2              | cytoplasm                             | + |   |   | + |   |   |
| EIF3E    | E5RGA2     | Eukaryotic translation initiation factor 3 subunit E              | cytoplasm                             |   |   |   | + |   |   |
| EIF3G    | K7ENA8     | Eukaryotic translation initiation factor 3 subunit G (Fragment)   | cytoplasm                             |   |   | + | + | + |   |
| EIF3M    | Q7L2H7-2   | Isoform 2 of Eukaryotic translation initiation factor 3 subunit M | eukaryotic 43S preinitiation complex  | + |   |   | + |   |   |
| EIF4A3   | I3L3H2     | Eukaryotic initiation factor 4A-III (Fragment)                    | nucleoplasm                           |   |   | + | + |   | + |
| EMD      | Q5HY57     | Emerin                                                            | endoplasmic reticulum                 |   |   |   | + |   |   |
| EPHB2    | B1AKC9     | Receptor protein-tyrosine kinase                                  | integral component of plasma membrane |   |   |   | + |   |   |
| EPPK1    | A0A075B730 | Epiplakin                                                         | cytoskeleton                          |   |   |   |   |   |   |
| ERLIN1   | B0QZ43     | Erlin-1 (Fragment)                                                |                                       |   |   |   | + |   |   |
| ERLIN2   | O94905     | Erlin-2 (Fragment)                                                | cytoplasm                             |   |   | + | + |   |   |
| ERMP1    | E7ER77     | Endoplasmic reticulum metalloproteinase 1                         |                                       |   |   |   | + |   |   |
| ESF1     | Q9H501     | ESF1 homolog                                                      | extracellular space                   |   |   |   | + |   |   |
| EVPL     | Q92817     | Envoplakin                                                        | cornified envelope                    |   |   |   | + |   |   |

|         |          |                                                                      |                        |   |  |   |   |   |   |   |
|---------|----------|----------------------------------------------------------------------|------------------------|---|--|---|---|---|---|---|
| EXOC1   | Q9NV70   | Exocyst complex component 1                                          | cytoplasm              |   |  |   |   | + |   |   |
| EXOC2   | Q96KP1   | Exocyst complex component 2                                          | cytosol                |   |  |   |   | + |   |   |
| EXOC4   | B7Z321   | Isoform 2 of Exocyst complex component 4                             |                        |   |  |   |   | + |   |   |
| FAF2    | Q96CS3   | FAS-associated factor 2                                              | endoplasmic reticulum  | + |  |   |   | + |   |   |
| FAM120A | Q9NZB2-4 | Isoform D of Constitutive coactivator of PPAR-gamma-like protein 1   | cytoplasm              |   |  |   |   | + |   |   |
| FAM49A  | Q9H0Q0   | Protein FAM49A                                                       | intracellular          |   |  |   |   |   |   |   |
| FANCI   | Q9NV11   | Isoform 1 of Fanconi anemia group I protein                          | cytoplasm              |   |  |   |   | + |   |   |
| FARSB   | Q9NSD9   | Phenylalanine--tRNA ligase beta subunit                              | cytoplasm              |   |  |   |   | + | + |   |
| FBL     | M0QXL5   | rRNA 2'-O-methyltransferase fibrillar (Fragment)                     | box C/D snoRNP complex |   |  |   | + | + |   | + |
| FDFT1   | P37268-4 | Isoform 4 of Squalene synthase                                       | endoplasmic reticulum  |   |  |   |   | + |   |   |
| FERMT1  | Q9BQL6   | Fermitin family homolog 1                                            | cell junction          |   |  |   |   | + |   |   |
| FLG2    | Q5D862   | Filaggrin-2                                                          | cytoplasm              |   |  |   |   |   |   |   |
| FUS     | P35637   | RNA-binding protein FUS                                              | dendritic spine head   |   |  |   | + | + | + | + |
| FXR1    | P51114-3 | Isoform 3 of Fragile X mental retardation syndrome-related protein 1 | axon                   | + |  |   |   | + |   |   |
| G3BP1   | E5RI46   | Ras GTPase-activating protein-binding protein 1 (Fragment)           | intracellular          |   |  |   | + | + |   | + |
| G3BP2   | Q9UN86-2 | Isoform B of Ras GTPase-activating protein-binding protein 2         | cytoplasm              |   |  |   | + | + |   |   |
| GARS    | H7C443   | Glycine--tRNA ligase (Fragment)                                      |                        |   |  | + | + | + | + | + |
| GBP1    | P32455   | Guanylate-binding protein 1                                          | cytosol                |   |  |   |   | + |   |   |
| GCLM    | P48507   | Glutamate--cysteine ligase regulatory subunit                        | cytosol                |   |  |   |   | + |   |   |
| GFPT1   | Q06210-2 | Isoform 2 of Glutamine--fructose-6-phosphate aminotransferase        | cytosol                |   |  |   | + | + |   | + |



|        |          |                                                                               |                                            |   |   |   |   |  |   |
|--------|----------|-------------------------------------------------------------------------------|--------------------------------------------|---|---|---|---|--|---|
|        |          | [isomerizing] 1                                                               |                                            |   |   |   |   |  |   |
| GMPS   | P49915   | GMP synthase [glutamine-hydrolyzing]                                          | cytoplasm                                  | + |   | + | + |  | + |
| GNAI2  | P04899-6 | Isoform 6 of Guanine nucleotide-binding protein G(i) subunit alpha-2          | centrosome                                 | + |   |   | + |  |   |
| GNB1   | F6X3N5   | Guanine nucleotide-binding protein G(I)/G(S)/G(T) subunit beta-1 (Fragment)   |                                            |   | + | + |   |  |   |
| GNB2   | C9JZN1   | Guanine nucleotide-binding protein G(I)/G(S)/G(T) subunit beta-2 (Fragment)   |                                            |   | + | + |   |  |   |
| GNB3   | P16520-2 | Isoform 2 of Guanine nucleotide-binding protein G(I)/G(S)/G(T) subunit beta-3 | dendrite                                   |   |   |   |   |  |   |
| GNB4   | C9JD14   | Guanine nucleotide-binding protein subunit beta-4 (Fragment)                  |                                            |   |   |   | + |  |   |
| GPD2   | F5GYK7   | Glycerol-3-phosphate dehydrogenase                                            | glycerol-3-phosphate dehydrogenase complex |   |   |   | + |  | + |
| GSPT1  | P15170   | Eukaryotic peptide chain release factor GTP-binding subunit ERF3A             | cytosol                                    |   |   | + | + |  |   |
| GTPBP1 | F5H716   | GTP-binding protein 1 (Fragment)                                              |                                            |   |   |   | + |  |   |
| GYS1   | P13807   | Glycogen [starch] synthase, muscle                                            | cytoplasm                                  |   |   |   | + |  |   |
| HACD3  | H3BMZ1   | Very-long-chain (3R)-3-hydroxyacyl-CoA dehydratase 3 (Fragment)               |                                            |   |   |   | + |  |   |
| HGH1   | Q9BTY7   | Protein HGH1 homolog                                                          |                                            | + |   |   |   |  |   |
| HGS    | O14964-2 | Isoform 2 of Hepatocyte growth factor-regulated tyrosine kinase substrate     | cytoplasm                                  |   |   |   | + |  |   |
| HK2    | E9PB90   | Hexokinase                                                                    | cytosol                                    | + |   |   | + |  |   |
| HKDC1  | Q2TB90   | Putative hexokinase HKDC1                                                     | cytosol                                    |   |   |   |   |  | + |
| HMCES  | D6RAI0   | Embryonic stem cell-specific 5-hydroxymethylcytosine-binding                  |                                            |   |   | + |   |  |   |

|          |          |                                                                  |                              |   |   |   |   |   |   |
|----------|----------|------------------------------------------------------------------|------------------------------|---|---|---|---|---|---|
|          |          | protein (Fragment)                                               |                              |   |   |   |   |   |   |
| HNRNPAB  | Q99729-2 | Isoform 2 of Heterogeneous nuclear ribonucleoprotein A/B         | cytoplasm                    |   |   | + | + |   |   |
| HNRNPH2  | P55795   | Heterogeneous nuclear ribonucleoprotein H2                       | membrane                     | + |   |   | + |   |   |
| HNRNPR   | O43390-3 | Isoform 3 of Heterogeneous nuclear ribonucleoprotein R           | catalytic step 2 spliceosome | + | + | + | + |   | + |
| HSD17B10 | Q5H928   | 3-hydroxyacyl-CoA dehydrogenase type-2                           |                              | + | + | + | + |   | + |
| HSDL2    | Q6YN16-2 | Isoform 2 of Hydroxysteroid dehydrogenase-like protein 2         | membrane                     | + |   |   | + |   |   |
| HSPA2    | P54652   | Heat shock-related 70 kDa protein 2                              | blood microparticle          |   |   |   | + |   | + |
| HSPA5    | P11021   | 78 kDa glucose-regulated protein                                 | cell surface                 |   | + | + | + |   | + |
| HSPA8    | E9PK54   | Heat shock cognate 71 kDa protein (Fragment)                     |                              | + | + | + | + |   | + |
| HSPA1L   | P34931   | Heat shock 70 kDa protein 1-like                                 | blood microparticle          |   |   |   | + |   |   |
| HSPB1    | P04792   | Heat shock protein beta-1                                        | cytoplasm                    |   | + | + | + |   | + |
| HUWE1    | Q7Z6Z7-2 | E3 ubiquitin-protein ligase HUWE1                                | cytoplasm                    |   |   | + | + |   |   |
| IDH1     | O75874   | Isocitrate dehydrogenase [NADP] cytoplasmic                      | cytoplasm                    | + |   |   | + |   | + |
| IGF2BP2  | Q9Y6M1-1 | Isoform 2 of Insulin-like growth factor 2 mRNA-binding protein 2 | cytoplasm                    |   |   |   | + |   | + |
| IMPDH1   | C9K0R9   | Inosine-5'-monophosphate dehydrogenase 1 (Fragment)              | cell junction                | + |   |   | + |   |   |
| IMPDH2   | E7ETK5   | Inosine-5'-monophosphate dehydrogenase 2 (Fragment)              |                              | + | + | + | + | + | + |
| INCENP   | Q9NQS7   | Inner centromere protein                                         | central element              |   |   |   | + |   |   |
| IPO8     | O15397   | Importin-8                                                       | cytosol                      |   |   |   | + |   |   |
| IQGAP1   | P46940   | Ras GTPase-activating-like protein IQGAP1                        | actin filament               | + |   | + | + |   | + |
| ITGA2    | E9PB77   | Integrin alpha-2                                                 | integrin complex             |   |   |   | + |   |   |
| KARS     | Q15046   | Lysine--tRNA ligase                                              | aminoacyl-tRNA               | + |   | + | + | + |   |

|          |            |                                                              |                                |   |   |   |   |  |   |
|----------|------------|--------------------------------------------------------------|--------------------------------|---|---|---|---|--|---|
|          |            |                                                              | synthetase multienzyme complex |   |   |   |   |  |   |
| KIF23    | Q02241-3   | Isoform 3 of Kinesin-like protein KIF23                      | centralspindlin complex        |   |   |   | + |  |   |
| KIF2A    | O00139-2   | Isoform 2 of Kinesin-like protein KIF2A                      | centrosome                     | + |   |   | + |  |   |
| KLC2     | Q9H0B6-2   | Isoform 2 of Kinesin light chain 2                           | ciliary rootlet                |   |   |   | + |  |   |
| KRT17    | K7EPJ9     | Keratin, type I cytoskeletal 17 (Fragment)                   | intermediate filament          |   |   |   |   |  |   |
| KRT28    | Q7Z3Y7     | Keratin, type I cytoskeletal 28                              | cytoplasm                      |   |   |   |   |  |   |
| KRT35    | C4AM86     | Keratin, type I cuticular Ha5                                | intermediate filament          |   |   |   |   |  |   |
| KRT78    | Q8N1N4-2   | Isoform 2 of Keratin, type II cytoskeletal 78                | extracellular exosome          |   |   |   |   |  |   |
| KRT85    | P78386     | Keratin, type II cuticular Hb5                               | extracellular space            |   |   |   |   |  | + |
| KRT33A   | O76009     | Keratin, type I cuticular Ha3-I                              | extracellular space            |   |   |   |   |  |   |
| KRT6B    | P04259     | Keratin, type II cytoskeletal 6B                             | extracellular exosome          |   |   |   |   |  |   |
| KRT87P   | A6NCN2     | Putative keratin-87 protein                                  | extracellular space            |   |   |   |   |  |   |
| LANCL1   | F8WDS9     | LanC-like protein 1                                          |                                |   |   |   | + |  |   |
| LAS1L    | Q9Y4W2-4   | Isoform 4 of Ribosomal biogenesis protein LAS1L              | cytoplasm                      | + |   |   | + |  |   |
| LCP1     | P13796     | Plastin-2                                                    | actin cytoskeleton             | + | + | + | + |  |   |
| LETM1    | O95202     | LETM1 and EF-hand domain-containing protein 1, mitochondrial | integral component of membrane | + |   |   | + |  |   |
| LGALS3BP | Q08380     | Galectin-3-binding protein                                   | blood microparticle            |   |   |   | + |  |   |
| LMNA     | P02545-3   | Isoform ADelta10 of Prelamin-A/C                             | cytoplasm                      |   |   | + | + |  | + |
| LMNB1    | A0A0D9SFE5 | Lamin B1, isoform CRA                                        | lamin filament                 | + |   | + | + |  | + |
| LRRC40   | Q9H9A6     | Leucine-rich repeat-containing protein 40                    | membrane                       | + |   | + | + |  |   |
| LRRC47   | Q8N1G4     | Leucine-rich repeat-containing protein 47                    |                                | + |   | + | + |  |   |
| LSG1     | Q9H089     | Large subunit GTPase 1 homolog                               | Cajal body                     |   |   |   | + |  |   |

|                |          |                                                             |                                |   |   |   |   |   |   |
|----------------|----------|-------------------------------------------------------------|--------------------------------|---|---|---|---|---|---|
| LSS            | P48449-3 | Isoform 2 of Lanosterol synthase                            | endoplasmic reticulum membrane |   |   |   | + |   |   |
| MAD1L1         | C9JPS1   | Mitotic spindle assembly checkpoint protein MAD1 (Fragment) |                                |   |   | + | + |   |   |
| MAGEA1         | P43355   | Melanoma-associated antigen 1                               | cytoplasm                      |   |   |   | + |   |   |
| MAGEA4         | C9JIR1   | Melanoma-associated antigen 4 (Fragment)                    |                                |   |   |   | + | + |   |
| MAGEA8         | P43361   | Melanoma-associated antigen 8                               |                                |   |   |   |   |   |   |
| MAGEA10        | P43363   | Melanoma-associated antigen 10                              | nucleus                        |   |   |   |   |   |   |
| MAGEB3         | O15480   | Melanoma-associated antigen B3                              |                                |   |   |   |   |   |   |
| MAGEB16        | A2A368   | Melanoma-associated antigen B16                             |                                |   |   |   |   |   |   |
| MAGEB17        | A8MXT2   | Melanoma-associated antigen B17                             |                                |   |   |   |   |   |   |
| MAGEB18        | Q96M61   | Melanoma-associated antigen B18                             | cytoplasm                      |   |   |   |   |   |   |
| MAGEC1         | O60732-2 | Isoform 2 of Melanoma-associated antigen C1                 |                                |   |   |   | + |   |   |
| MAGEC3         | Q8TD91-2 | Isoform 2 of Melanoma-associated antigen C3                 |                                |   |   |   |   |   |   |
| MAN1B1         | H0YGV7   | alpha-1,2-Mannosidase                                       | membrane                       |   |   |   | + |   |   |
| MAN2A1         | Q16706   | Alpha-mannosidase 2                                         | cis-Golgi network              |   |   |   | + |   |   |
| MAP4           | P27816-2 | Microtubule-associated protein (Fragment)                   | cytoplasm                      | + | + | + | + | + | + |
| MAPK14         | E7EX54   | Mitogen-activated protein kinase 14 (Fragment)              |                                | + | + |   | + |   |   |
| MARCKS         | P29966   | Myristoylated alanine-rich C-kinase substrate               | actin cytoskeleton             |   |   |   | + |   | + |
| DKFZp686L22104 | Q68E03   | Matrin-3                                                    | nucleus                        | + | + | + | + | + | + |
| MCMBP          | Q9BTE3-2 | Mini-chromosome maintenance complex-binding protein         | cytoplasm                      | + |   | + | + |   |   |
| MDC1           | Q14676-2 | Isoform 2 of Mediator of DNA damage checkpoint protein 1    | chromosome                     |   |   |   | + | + |   |
| MLH1           | P40692-3 | Isoform 3 of DNA mismatch repair protein Mlh1               | chiasma                        |   |   |   | + | + |   |

|        |          |                                                                           |                              |   |   |   |   |  |   |
|--------|----------|---------------------------------------------------------------------------|------------------------------|---|---|---|---|--|---|
| MRPS9  | P82933   | 28S ribosomal protein S9, mitochondrial                                   | mitochondrial inner membrane | + |   |   | + |  |   |
| MSN    | P26038   | Moesin                                                                    | apical part of cell          | + | + | + | + |  | + |
| MTA2   | O94776   | Metastasis-associated protein MTA2                                        | histone deacetylase complex  |   |   |   | + |  |   |
| MTDH   | E5RJU9   | Protein LYRIC                                                             | endoplasmic reticulum        |   |   |   | + |  |   |
| MTIF2  | P46199   | Translation initiation factor IF-2, mitochondrial (Fragment)              | mitochondrion                |   |   |   | + |  |   |
| MYH14  | Q7Z406   | Myosin-14                                                                 | actomyosin                   |   |   |   | + |  |   |
| NACA   | F8VZJ2   | Nascent polypeptide-associated complex subunit alpha                      |                              |   |   | + | + |  | + |
| NANS   | Q5TBR1   | Sialic acid synthase (Fragment)                                           |                              | + | + |   | + |  |   |
| NAPIL4 | A8MXH2   | Nucleosome assembly protein 1-like 4 (Fragment)                           | nucleus                      |   |   | + | + |  | + |
| NAPA   | M0R0Y2   | Alpha-soluble NSF attachment protein                                      | SNARE complex                |   |   |   | + |  | + |
| NBN    | O60934   | Nibrin                                                                    | Mre11 complex                |   |   |   | + |  |   |
| NCAPG2 | Q86XI2-2 | Isoform 2 of Condensin-2 complex subunit G2                               | membrane                     |   |   |   | + |  |   |
| NCEH1  | H7C046   | Neutral cholesterol ester hydrolase 1 (Fragment)                          |                              |   |   |   | + |  |   |
| NDUFS1 | P28331-3 | Isoform 3 of NADH-ubiquinone oxidoreductase 75 kDa subunit, mitochondrial | mitochondrial inner membrane | + | + |   | + |  | + |
| NFS1   | B4DNL7   | Isoform 3 of Cysteine desulfurase, mitochondrial                          | cytoplasm                    |   |   |   |   |  |   |
| NHLRC2 | Q8NBF2   | NHL repeat-containing protein 2                                           |                              |   |   | + | + |  |   |
| NOL6   | Q9H6R4-2 | Isoform 2 of Nucleolar protein 6                                          | condensed nuclear chromosome |   |   |   | + |  |   |
| NOP2   | P46087   | Probable 28S rRNA (cytosine(4447)-C(5))-methyltransferase                 | nucleolus                    |   |   | + | + |  |   |
| NT5C3A | Q9H0P0-2 | Isoform 3 of Cytosolic 5'-nucleotidase 3A                                 | cytoplasm                    |   |   |   | + |  |   |

|        |            |                                                                              |                                  |   |   |   |   |  |   |
|--------|------------|------------------------------------------------------------------------------|----------------------------------|---|---|---|---|--|---|
| NT5DC1 | Q5TFE4     | 5'-nucleotidase domain-containing protein 1                                  |                                  | + |   |   | + |  |   |
| NUB1   | Q9Y5A7-2   | Isoform 2 of NEDD8 ultimate buster 1                                         | cytoplasm                        |   |   |   | + |  |   |
| NUP43  | Q8NFH3     | Nucleoporin Nup43                                                            | condensed chromosome kinetochore |   |   | + | + |  |   |
| NUP50  | Q9UKX7-2   | Isoform 2 of Nuclear pore complex protein Nup50                              | cytoplasm                        | + |   | + | + |  |   |
| NUP85  | J3KT10     | Nuclear pore complex protein Nup85                                           |                                  |   |   |   | + |  |   |
| NUP98  | P52948-6   | Isoform 6 of Nuclear pore complex protein Nup98-Nup96                        | cytosol                          | + |   |   | + |  |   |
| NUP133 | Q8WUM0     | Nuclear pore complex protein Nup133                                          | condensed chromosome kinetochore |   |   |   | + |  | + |
| NXF1   | E9PIN3     | Nuclear RNA export factor 1 (Fragment)                                       | cytoplasm                        |   |   |   | + |  | + |
| NXN    | Q6DKJ4     | Nucleoredoxin                                                                | cytosol                          |   |   |   | + |  |   |
| OGDH   | F5H801     | 2-oxoglutarate dehydrogenase, mitochondrial                                  |                                  |   |   |   | + |  |   |
| OGDHL  | Q9ULD0-3   | Isoform 3 of 2-oxoglutarate dehydrogenase-like, mitochondrial                | mitochondrial matrix             |   |   |   |   |  |   |
| OGFR   | A0A0A0MRN5 | Opioid growth factor receptor                                                | membrane                         |   |   |   | + |  |   |
| OSBP   | P22059     | Oxysterol-binding protein 1                                                  | cell junction                    |   |   |   | + |  |   |
| OSBPL8 | F8VQX7     | Oxysterol-binding protein (Fragment)                                         |                                  |   |   | + | + |  |   |
| OTUB1  | F5H3F0     | Ubiquitin thioesterase OTUB1                                                 |                                  |   |   |   | + |  |   |
| OXCT1  | P55809-2   | Isoform 2 of Succinyl-CoA:3-ketoacid coenzyme A transferase 1, mitochondrial | mitochondrial matrix             |   |   | + | + |  | + |
| P4HB   | I3L3U6     | Protein disulfide-isomerase (Fragment)                                       | cell                             |   | + | + | + |  | + |
| PABPC1 | P11940-2   | Polyadenylate-binding protein 1 (Fragment)                                   | catalytic step 2 spliceosome     | + |   | + | + |  | + |
| PABPC3 | Q9H361     | Polyadenylate-binding protein 3                                              | cytoplasm                        |   |   | + | + |  |   |

|          |            |                                                                               |                                      |   |   |   |   |   |   |
|----------|------------|-------------------------------------------------------------------------------|--------------------------------------|---|---|---|---|---|---|
| PAFAH1B1 | P43034     | Platelet-activating factor acetylhydrolase IB subunit alpha                   | astral microtubule                   |   |   |   | + | + |   |
| PCBP3    | P57721-2   | Isoform 2 of Poly(rC)-binding protein 3                                       | cytosol                              | + |   |   |   |   |   |
| PCK2     | H0YML5     | Phosphoenolpyruvate carboxykinase [GTP], mitochondrial                        |                                      |   | + |   | + |   |   |
| PDP1     | Q9P0J1     | [Pyruvate dehydrogenase [acetyl-transferring]]-phosphatase 1, mitochondrial   | mitochondrial matrix                 |   |   |   | + |   |   |
| PDS5B    | Q9NTI5-2   | Isoform 2 of Sister chromatid cohesion protein PDS5 homolog B                 | chromatin                            |   |   |   | + |   |   |
| PFAS     | J3KT98     | Phosphoribosylformylglycinamide synthase (Fragment)                           | cytoplasm                            | + |   |   | + |   | + |
| PFKL     | P17858     | ATP-dependent 6-phosphofructokinase, liver type                               | 6-phosphofructokinase complex        | + |   |   | + |   | + |
| PFKM     | P08237     | ATP-dependent 6-phosphofructokinase, muscle type                              | 6-phosphofructokinase complex        | + |   |   | + |   | + |
| PFN1     | P07737     | Profilin 1, isoform CRA                                                       | blood microparticle                  | + | + | + | + |   | + |
| PGM2     | Q96G03     | Phosphoglucomutase-2                                                          | cytosol                              |   |   |   | + |   |   |
| PLCB3    | Q01970-2   | Isoform 2 of 1-phosphatidylinositol 4,5-bisphosphate phosphodiesterase beta-3 | cytosol                              |   |   |   | + |   | + |
| PLS1     | C9JAM8     | Plastin-1 (Fragment)                                                          |                                      |   |   |   | + |   | + |
| PLS3     | P13797-3   | Isoform 3 of Plastin-3                                                        | cytoplasm                            | + | + |   | + | + | + |
| POLA2    | E9PIQ6     | DNA polymerase alpha subunit B (Fragment)                                     | alpha DNA polymerase:primase complex |   |   |   | + |   |   |
| POLR1A   | B9ZVN9     | DNA-directed RNA polymerase                                                   | cytoplasm                            |   |   |   | + |   |   |
| POLR1C   | D6RDJ3     | DNA-directed RNA polymerases I and III subunit RPAC1 (Fragment)               |                                      |   |   |   | + |   |   |
| POLR2B   | C9J2Y9     | DNA-directed RNA polymerase                                                   | nucleoplasm                          |   |   |   | + |   |   |
| PON2     | A0A0J9YYG4 | Serum paraoxonase/arylesterase 2                                              |                                      |   |   |   | + |   |   |
| POR      | P16435     | NADPH--cytochrome P450                                                        | cytosol                              |   |   |   | + | + | + |

|         |            |                                                                                  |                                                            |   |   |   |   |   |   |
|---------|------------|----------------------------------------------------------------------------------|------------------------------------------------------------|---|---|---|---|---|---|
|         |            | reductase                                                                        |                                                            |   |   |   |   |   |   |
| PPA1    | Q5SQT6     | Inorganic pyrophosphatase                                                        | cytoplasm                                                  | + | + |   | + | + | + |
| PPM1G   | O15355     | Protein phosphatase 1G                                                           | cytoplasm                                                  |   | + | + | + | + | + |
| PRDX2   | P32119-2   | Isoform 2 of Peroxiredoxin-2                                                     | cytoplasm                                                  |   | + | + | + |   |   |
| PRDX6   | P30041     | Peroxiredoxin-6                                                                  | cytoplasm                                                  | + | + | + | + |   | + |
| PRKAR1A | K7EM13     | cAMP-dependent protein kinase type I-alpha regulatory subunit (Fragment)         |                                                            |   |   | + |   |   |   |
| PRMT5   | H0YJ77     | Protein arginine N-methyltransferase 5 (Fragment)                                |                                                            | + |   |   | + |   |   |
| PRPF4   | O43172-2   | Isoform 2 of U4/U6 small nuclear ribonucleoprotein Prp4                          | Cajal body                                                 |   |   |   | + | + |   |
| PSMD6   | H7C531     | 26S proteasome non-ATPase regulatory subunit 6 (Fragment)                        | proteasome regulatory particle                             |   |   |   | + |   |   |
| PSMD12  | O00232     | 26S proteasome non-ATPase regulatory subunit 12                                  | cytosol                                                    | + |   |   | + |   | + |
| PSME3   | P61289     | Proteasome activator complex subunit 3 (Fragment)                                | cytoplasm                                                  | + |   | + | + |   | + |
| PSMG2   | K7ENR6     | Proteasome assembly chaperone 2                                                  |                                                            |   |   |   | + |   |   |
| PTCD3   | Q96EY7-2   | Isoform 2 of Pentatricopeptide repeat domain-containing protein 3, mitochondrial | mitochondrial inner membrane                               | + |   |   | + |   |   |
| PTK2    | E9PEI4     | Focal adhesion kinase 1                                                          | extrinsic component of cytoplasmic side of plasma membrane |   |   | + |   |   |   |
| PTPN1   | P18031     | Tyrosine-protein phosphatase non-receptor type 1                                 | cytoplasmic side of endoplasmic reticulum membrane         | + | + |   | + |   |   |
| RAB25   | A0A0C4DGX5 | Ras-related protein Rab-25                                                       | membrane                                                   |   |   |   | + |   |   |
| RAB2A   | P61019     | Ras-related protein Rab-2A (Fragment)                                            | endoplasmic reticulum membrane                             |   |   |   | + |   | + |
| RABGAP1 | Q9Y3P9     | Isoform 2 of Rab GTPase-activating protein 1                                     | centrosome                                                 |   |   |   |   |   |   |



|         |          |                                                                          |                                |   |  |   |   |   |   |
|---------|----------|--------------------------------------------------------------------------|--------------------------------|---|--|---|---|---|---|
| RARS    | E5RJM9   | Arginine--tRNA ligase, cytoplasmic                                       | cytoplasm                      | + |  |   | + |   | + |
| RBM14   | Q96PK6   | RNA-binding protein 14                                                   | mediator complex               | + |  | + |   |   |   |
| RDH11   | Q8TC12-3 | Isoform 3 of Retinol dehydrogenase 11                                    | endoplasmic reticulum membrane |   |  |   | + |   |   |
| RFC1    | H0Y8U4   | Replication factor C subunit 1 (Fragment)                                | cell junction                  |   |  | + | + |   |   |
| RFC2    | F8WC37   | Replication factor C subunit 2                                           |                                | + |  |   | + |   |   |
| ROCK2   | O75116   | Rho-associated protein kinase 2                                          | centrosome                     |   |  | + | + |   |   |
| RPL3    | B5MCW2   | 60S ribosomal protein L3 (Fragment)                                      | cytoplasm                      | + |  | + | + |   | + |
| RPL4    | P36578   | 60S ribosomal protein L4                                                 | cytoplasm                      | + |  |   | + |   |   |
| RPL8    | E9PP36   | 60S ribosomal protein L8                                                 | cytoplasm                      |   |  |   | + |   | + |
| RPL11   | Q5VVC9   | 60S ribosomal protein L11 (Fragment)                                     | ribosome                       |   |  | + | + |   |   |
| RPL13   | P26373   | 60S ribosomal protein L13                                                | cytoplasm                      |   |  | + | + |   | + |
| RPL14   | E7EPB3   | 60S ribosomal protein L14                                                | ribosome                       | + |  | + | + |   |   |
| RPL7A   | Q5T8U2   | 60S ribosomal protein L7a                                                | ribosome                       |   |  | + | + |   |   |
| RPN1    | P04843   | Dolichyl-diphosphooligosaccharide--protein glycosyltransferase subunit 1 | endoplasmic reticulum membrane | + |  |   | + |   | + |
| RPS2    | H0YEN5   | 40S ribosomal protein S2 (Fragment)                                      | cytoplasm                      | + |  | + | + |   |   |
| RPS6    | A2A3R5   | 40S ribosomal protein S6                                                 | cytoplasm                      | + |  |   | + |   | + |
| RPS4X   | A6NH36   | 40S ribosomal protein S4, X isoform                                      | ribosome                       | + |  | + | + |   | + |
| RPS6KA1 | E9PRI4   | Isoform 3 of Ribosomal protein S6 kinase alpha-1                         | cytoplasm                      |   |  |   | + |   |   |
| RRAGC   | Q9HB90   | Ras-related GTP-binding protein C                                        | cytoplasm                      |   |  |   | + |   |   |
| RRAGD   | Q9NQL2   | Ras-related GTP-binding protein D                                        | cytoplasm                      |   |  |   | + |   |   |
| RRM1    | E9PL69   | Ribonucleoside-diphosphate reductase large subunit                       | cytoplasm                      |   |  |   | + | + |   |
| RTCB    | Q9Y3I0   | tRNA-splicing ligase RtcB homolog                                        | cytoplasm                      | + |  |   | + |   | + |
| SAE1    | Q9UBE0-3 | Isoform 3 of SUMO-activating enzyme subunit 1                            | cytoplasm                      |   |  | + | + |   |   |
| SAMHD1  | Q9Y3Z3   | Isoform 4 of Deoxynucleoside                                             | intracellular                  |   |  |   | + | + |   |

|          |          |                                                              |                       |   |  |   |   |   |   |
|----------|----------|--------------------------------------------------------------|-----------------------|---|--|---|---|---|---|
|          |          | triphosphate triphosphohydrolase SAMHD1                      |                       |   |  |   |   |   |   |
| SART1    | O43290   | U4/U6.U5 tri-snRNP-associated protein 1                      | Cajal body            | + |  |   | + |   |   |
| SBNO1    | A3KN83-4 | Isoform 4 of Protein strawberry notch homolog 1              |                       |   |  |   | + |   |   |
| SBNO2    | Q9Y2G9-3 | Isoform 2 of Protein strawberry notch homolog 2              |                       |   |  |   | + |   |   |
| SCAMP3   | O14828-2 | Isoform 2 of Secretory carrier-associated membrane protein 3 | extracellular exosome |   |  | + | + |   |   |
| SCRN1    | Q12765-3 | Isoform 3 of Secernin-1                                      | cytoplasm             |   |  |   | + |   |   |
| SEC61A2  | A6NK38   | Protein transport protein Sec61 subunit alpha isoform 2      | membrane              |   |  |   | + |   |   |
| SEPT9    | Q9UHD8   | Septin-9                                                     | actin cytoskeleton    | + |  |   | + | + |   |
| SERPINB5 | P36952   | Isoform 2 of Serpin B5                                       | cytoplasm             |   |  |   | + |   |   |
| SF3B4    | Q15427   | Splicing factor 3B subunit 4                                 | nucleoplasm           |   |  |   | + |   |   |
| SFXN1    | D6RAE9   | Sideroflexin-1                                               | membrane              |   |  |   | + |   | + |
| SHMT1    | P34896-3 | Isoform 3 of Serine hydroxymethyltransferase, cytosolic      | cytoplasm             |   |  |   | + |   | + |
| SIN3A    | Q96ST3   | Paired amphipathic helix protein Sin3a                       | chromatin             |   |  | + | + |   |   |
| SKIV2L   | Q15477   | Helicase SKI2W                                               | nucleoplasm           |   |  |   | + |   |   |
| SLAIN1   | Q5T6P2   | SLAIN motif-containing protein 1 (Fragment)                  |                       |   |  |   |   |   |   |
| SLC1A5   | Q15758   | Neutral amino acid transporter B(0)                          | extracellular exosome |   |  |   | + |   | + |
| SLC25A3  | Q00325-2 | Isoform B of Phosphate carrier protein, mitochondrial        | extracellular exosome |   |  |   | + |   | + |
| SLC25A5  | P05141   | ADP/ATP translocase 2                                        | extracellular exosome | + |  | + | + |   | + |
| SMARCC2  | Q8TAQ2   | SWI/SNF complex subunit SMARCC2                              | nBAF complex          |   |  |   | + |   |   |
| SNX1     | H0YK42   | Sorting nexin-1                                              | endosome              |   |  | + |   | + |   |
| SNX5     | Q5QPE4   | Sorting nexin-5 (Fragment)                                   | endosome              |   |  |   | + |   |   |

|         |            |                                                                    |                                |   |  |  |   |   |   |
|---------|------------|--------------------------------------------------------------------|--------------------------------|---|--|--|---|---|---|
| SPR     | P35270     | Sepiapterin reductase                                              | cytoplasm                      |   |  |  | + |   | + |
| SPTAN1  | A0A0D9SF54 | Spectrin alpha chain, non-erythrocytic 1                           |                                |   |  |  | + | + | + |
| SPTLC1  | O15269     | Serine palmitoyltransferase 1                                      | endoplasmic reticulum membrane |   |  |  |   | + |   |
| SPTLC2  | O15270     | Serine palmitoyltransferase 2                                      | endoplasmic reticulum membrane |   |  |  |   | + |   |
| SRP68   | Q9UHB9-2   | Isoform 2 of Signal recognition particle subunit SRP68             | cytoplasm                      | + |  |  |   | + | + |
| SRP72   | O76094     | Isoform 2 of Signal recognition particle subunit SRP72             | cytoplasm                      | + |  |  | + | + |   |
| SRPR    | P08240     | Isoform 2 of Signal recognition particle receptor subunit alpha    | endoplasmic reticulum          |   |  |  |   | + | + |
| SRRT    | H7C3A1     | Serrate RNA effector molecule homolog (Fragment)                   | nucleoplasm                    | + |  |  | + | + |   |
| SSRP1   | Q08945     | FACT complex subunit SSRP1                                         | chromosome                     | + |  |  | + | + | + |
| STAU1   | O95793-2   | Isoform 3 of Double-stranded RNA-binding protein Staufen homolog 1 | cell body                      |   |  |  |   | + | + |
| STK24   | Q9Y6E0-2   | Isoform A of Serine/threonine-protein kinase 24                    | cytoplasm                      |   |  |  | + | + |   |
| STRIP1  | Q5VSL9-3   | Isoform 3 of Striatin-interacting protein 1                        | cytoplasm                      |   |  |  |   | + |   |
| STRIP2  | Q9ULQ0-2   | Isoform 2 of Striatin-interacting protein 2                        | cytoplasm                      |   |  |  |   | + |   |
| STRN    | O43815     | Striatin                                                           | bicellular tight junction      |   |  |  | + | + |   |
| SUPV3L1 | Q8IYB8     | ATP-dependent RNA helicase SUPV3L1, mitochondrial                  | mitochondrial degradosome      |   |  |  |   | + |   |
| SWAP70  | Q9UH65     | Switch-associated protein 70                                       | cytosol                        |   |  |  |   | + | + |
| SYMPK   | A0A087WUE9 | Symplekin                                                          |                                | + |  |  | + | + |   |
| TAF6    | P49848     | Transcription initiation factor TFIID subunit 6                    | cytoplasm                      |   |  |  |   | + |   |
| TAP2    | Q03519     | Isoform 2 of Antigen peptide transporter 2                         | endoplasmic reticulum membrane |   |  |  |   | + |   |

|          |            |                                                                                   |                                             |   |   |   |   |   |   |
|----------|------------|-----------------------------------------------------------------------------------|---------------------------------------------|---|---|---|---|---|---|
| TBC1D23  | E9PGE5     | TBC1 domain family member 23                                                      |                                             |   |   |   | + |   |   |
| TBK1     | Q9UHD2     | Serine/threonine-protein kinase TBK1                                              | cytoplasm                                   |   |   |   | + |   |   |
| TELO2    | H3BRS3     | Telomere length regulation protein TEL2 homolog                                   |                                             |   |   | + | + |   |   |
| TES      | Q9UGI8-2   | Isoform 2 of Testin                                                               | cell junction                               |   |   | + | + |   |   |
| TKT      | A0A0B4J1R6 | Transketolase                                                                     |                                             | + | + | + | + |   | + |
| TOP2B    | E9PCY5     | DNA topoisomerase 2 (Fragment)                                                    | DNA topoisomerase complex (ATP-hydrolyzing) | + |   |   | + |   |   |
| TOR1AIP1 | Q5JTV8     | Torsin-1A-interacting protein 1                                                   | integral component of membrane              | + |   | + | + |   |   |
| TP63     | Q9H3D4-10  | Isoform 12 of Tumor protein 63                                                    | cytoplasm                                   |   |   |   |   |   |   |
| TRIM25   | Q14258     | E3 ubiquitin/ISG15 ligase TRIM25                                                  | cytoplasm                                   | + |   |   | + | + |   |
| TRIM29   | Q14134-2   | Tripartite motif-containing protein 29                                            | cytoplasm                                   |   |   |   | + | + |   |
| TRMT6    | Q9UJA5-4   | Isoform 4 of tRNA (adenine(58)-N(1))-methyltransferase non-catalytic subunit TRM6 | nucleus                                     |   |   |   | + |   |   |
| TRMT10C  | Q7L0Y3     | Mitochondrial ribonuclease P protein 1                                            | mitochondrial nucleoid                      | + |   |   | + |   |   |
| TSMF     | C9JT21     | Elongation factor Ts (Fragment)                                                   | mitochondrial matrix                        |   |   | + | + |   |   |
| TUBB4B   | P68371     | Tubulin beta-4B chain                                                             | cytoskeleton                                |   | + | + | + | + | + |
| UAP1     | Q16222     | UDP-N-acetylhexosamine pyrophosphorylase                                          | cytoplasm                                   |   |   |   | + |   |   |
| UBA6     | A0AVT1-2   | Isoform 2 of Ubiquitin-like modifier-activating enzyme 6                          | cytoplasm                                   |   |   |   | + |   |   |
| UBE4B    | O95155-2   | Isoform 2 of Ubiquitin conjugation factor E4 B                                    | cytoplasm                                   |   |   | + | + |   |   |
| UBTF     | E9PLT2     | Nucleolar transcription factor 1 (Fragment)                                       |                                             | + |   | + | + |   |   |
| UCK2     | Q9BZX2     | Uridine-cytidine kinase 2                                                         | cytosol                                     |   |   | + | + |   |   |

|         |            |                                                             |                                          |   |   |   |   |   |   |
|---------|------------|-------------------------------------------------------------|------------------------------------------|---|---|---|---|---|---|
| UQCRC1  | P31930     | Cytochrome b-c1 complex subunit 1, mitochondrial            | mitochondrial inner membrane             | + |   | + | + |   | + |
| UQCRC2  | H3BP04     | Cytochrome b-c1 complex subunit 2, mitochondrial (Fragment) | mitochondrion                            |   |   |   | + |   | + |
| USP8    | A0A075B720 | Ubiquitin carboxyl-terminal hydrolase 8                     | extrinsic component of endosome membrane |   |   |   | + |   |   |
| USP39   | B9A018     | U4/U6.U5 tri-snRNP-associated protein 2                     |                                          |   |   |   | + |   |   |
| VAT1    | K7EM19     | Synaptic vesicle membrane protein VAT-1 homolog (Fragment)  |                                          |   |   |   | + |   | + |
| WBP11   | Q9Y2W2     | WW domain-binding protein 11                                | cytoplasm                                |   |   | + | + |   |   |
| WDHD1   | C9JW18     | Isoform 2 of WD repeat and HMG-box DNA-binding protein 1    | chromosome, centromeric region           |   |   | + | + |   |   |
| WRNIP1  | Q96S55     | ATPase WRNIP1                                               | membrane                                 | + |   |   | + |   |   |
| XPNPEP1 | G8JLB2     | Xaa-Pro aminopeptidase 1                                    | cytoplasm                                |   |   |   | + | + |   |
| XPO4    | F2Z2X4     | Exportin-4                                                  | cytoplasm                                | + |   |   | + |   |   |
| XPO5    | E2QRM3     | Exportin-5                                                  |                                          | + |   |   | + |   |   |
| XRN2    | Q9H0D6-2   | Isoform 2 of 5'-3' exoribonuclease 2                        | aggresome                                | + |   | + | + |   | + |
| YWHAE   | P62258-2   | Isoform SV of 14-3-3 protein epsilon                        | axon                                     | + | + | + | + |   | + |
| YWHAG   | P61981     | 14-3-3 protein gamma                                        | cytoplasmic vesicle membrane             |   |   | + | + |   | + |
| YWHAQ   | P27348     | 14-3-3 protein theta                                        | cytoplasm                                | + | + | + | + | + | + |
| ZYX     | H0Y2Y8     | Zyxin (Fragment)                                            | cytoplasm                                |   |   | + | + |   |   |
